# Supplementary material for: Analysis of the machinery and intermediates of the 5hmC-mediated DNA demethylation pathway in aging on samples from the MARK-AGE Study
Source: publisher site journal article supplement (doi:10.18632/aging.101022), 2016-08-29
Supplement: Supplementary file 1 [file aging-v8i9-101022-supplementary-material-SD1.pdf]

SUPPLEMENTARY MATERIAL

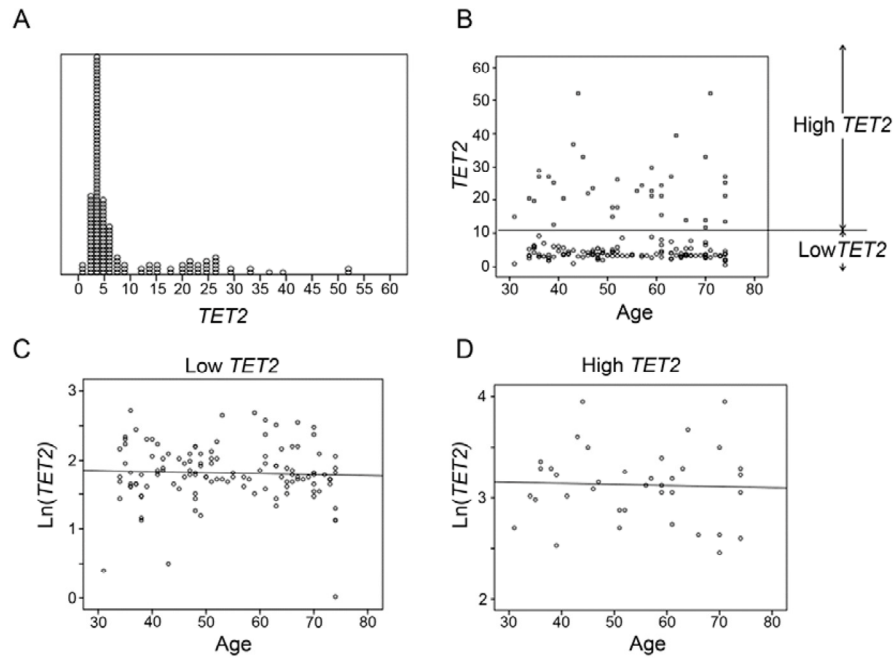

**Supplementary Figure 1. Bimodal distribution of *TET2* mRNA levels in PBMC.** (A) Cluster analysis was performed on *TET2* values data by two step cluster analysis implemented in SPSS package (based on log-likelihood distance measure) using Schwarz’s Bayesian as clustering criterion. The tool automatically identifies two clusters separated around the value of 10.0. The cut-off is slightly above the 75th percentile value (8.3). (B) *TET2* values showing a spread distribution across age. The subjects assigned to each cluster of *TET2* were named “low *TET2*” and “high *TET2*”. The panels below show the linear association with age of Ln(*TET2*) data with “low” (C) and “high” (D) levels of expression. Linear regression showed no significant changes with age for both classes.

**Supplementary Table 1. Regression analysis of *TET1* mRNA levels in PBMC†**

| Model                                |            | Coefficients  |        | Bootstrap for Coefficients |       |               |
|--------------------------------------|------------|---------------|--------|----------------------------|-------|---------------|
|                                      |            | B ± SE        | Beta   | Bias                       | Sig   | 95% CI        |
| <i>TET1</i>                          | (Constant) | 0.266 ± 0.024 |        | 0.001                      | 0.001 | 0.227;0.309   |
|                                      | Age (y)    | -0.001±0.000  | -0.239 | < 0.001                    | 0.001 | -0.002;-0.001 |
| Ln( <i>TET1</i> )                    | (Constant) | -1.316±0.113  |        | 0.005                      | 0.001 | -1.533;-1.112 |
|                                      | Age (y)    | -0.008±0.002  | -0.271 | < 0.001                    | 0.001 | -0.011;-0.004 |
| Ln( <i>TET1</i> )<br>B.C.            | (Constant) | -1.349±0.098  |        | < 0.001                    | 0.001 | -1.529;-1.148 |
|                                      | Age (y)    | -0.007±0.002  | -0.288 | < 0.001                    | 0.001 | -0.010;-0.004 |
| Ln( <i>TET1</i> )<br>B.C._age;gender | (Constant) | -1.273±0.097  |        | 0.000                      | 0.001 | -1.458;-1.089 |
|                                      | Age (y)    | -0.008±0.002  | -0.341 | < 0.001                    | 0.001 | -0.012;-0.005 |

† Regression analysis was performed by using as dependent variable: *TET1* non-transformed data; Ln(*TET1*) data; Ln(*TET1*) data after batch correction (B.C); and Ln(*TET1*) data after batch correction retaining age and gender differences (B.C.\_age;gender). Bootstrap results are based on 1000 stratified (by recruitment center and gender) bootstrap samples.

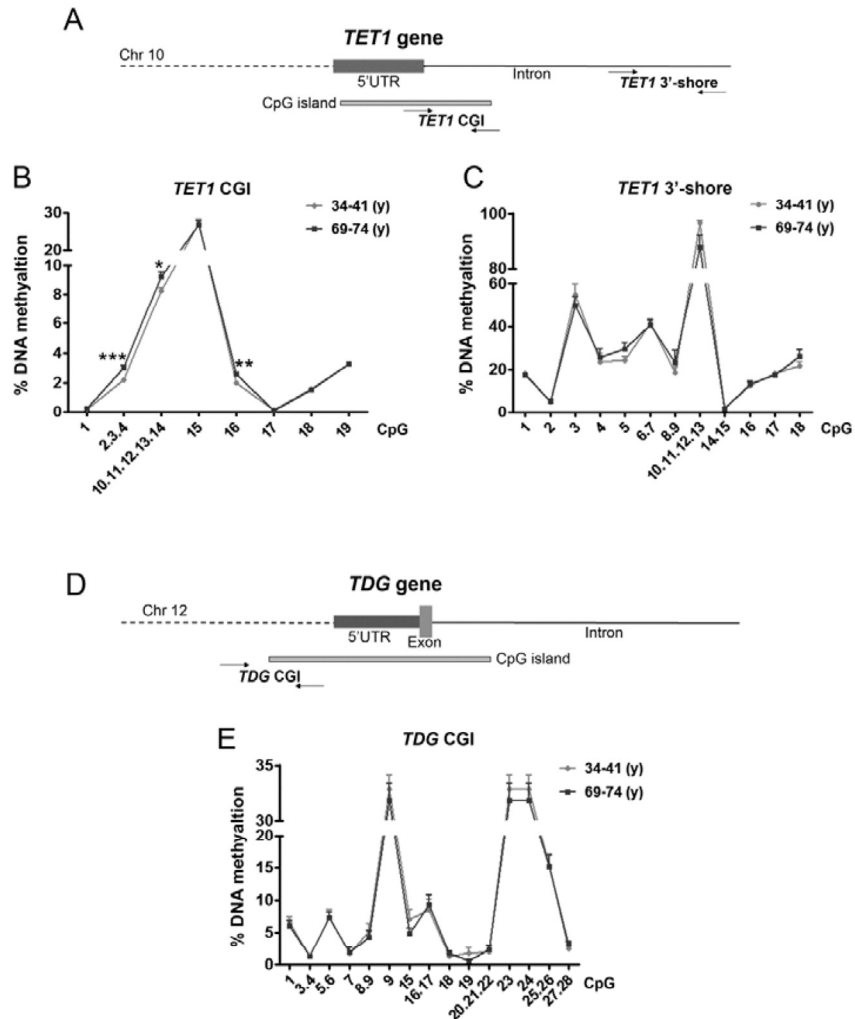

**Supplementary Figure 2. DNA methylation analysis of *TET1* and *TDG* regulatory regions. (A)** Schematic representation of *TET1* gene in which the localization of *TET1* CGI and *TET1* 3'-shore are shown. Age-related changes of DNA methylation in *TET1* CGI (**B**) and *TET1* 3'-shore (**C**) between the groups of young (< 41y) and old (>69 y) individuals are shown. (**D**) Schematic representation of *TDG* gene, in which the localization of CGI is shown. (**E**) Age-related changes of DNA methylation between the groups of young (< 41y) and the old (>69 y) individuals in the *TDG* CGI. Statistical significance was obtained using the Mann-Whitney test (\* $P < 0.05$ ; \*\* $P < 0.01$ ; \*\*\* $P < 0.001$ ).  $n(34-41)=36$ ;  $n(69-74)=34$ . (y)= years.

**Supplementary Table 2.** Regression analysis of *TET3* mRNA levels in PBMC†

| Model                                |            | Coefficients  |        | Bootstrap for Coefficients |       |               |
|--------------------------------------|------------|---------------|--------|----------------------------|-------|---------------|
|                                      |            | B ± SE        | Beta   | Bias                       | Sig   | 95% CI        |
| <i>TET3</i>                          | (Constant) | 3.684 ± 0.270 |        | 0.002                      | 0.001 | 3.177;4.202   |
|                                      | Age (y)    | -0.010±0.005  | -0.157 | < 0.001                    | 0.025 | -0.019;-0.001 |
| Ln( <i>TET3</i> )                    | (Constant) | 1.296±0.086   |        | 0.003                      | 0.001 | 1.136;1.443   |
|                                      | Age (y)    | -0.004±0.001  | -0.172 | < 0.001                    | 0.012 | -0.006;-0.001 |
| Ln( <i>TET3</i> )<br>B.C.            | (Constant) | 1.308±0.070   |        | -0.001                     | 0.001 | 1.180;1.439   |
|                                      | Age (y)    | -0.004±0.001  | -0.218 | < 0.001                    | 0.005 | -0.006;-0.001 |
| Ln( <i>TET3</i> )<br>B.C._age;gender | (Constant) | 1.361±0.071   |        | 0.002                      | 0.001 | 1.233;1.493   |
|                                      | Age (y)    | -0.005±0.001  | -0.269 | < 0.001                    | 0.001 | -0.007;-0.005 |

† Regression analysis was performed by using as dependent variable: *TET3* non-transformed data; Ln(*TET3*) data; Ln(*TET3*) data after batch correction (B.C); and Ln(*TET3*) data after batch correction retaining age and gender differences (B.C.\_age;gender). Bootstrap results are based on 1000 stratified (by recruitment center and gender) bootstrap samples.

**Supplementary Table 3.** Influence of selected factors and covariates on age-related changes of *TET1* expression†

| Test of Model Effects | <i>TET1</i> |                 |          | Ln( <i>TET1</i> ) |          | Ln( <i>TET1</i> )<br>B.C. |          | Ln( <i>TET1</i> )<br>B.C._age;gender |        |
|-----------------------|-------------|-----------------|----------|-------------------|----------|---------------------------|----------|--------------------------------------|--------|
|                       | Type III    | Type III        | Type III | Type III          | Type III | Type III                  | Type III |                                      |        |
| Variables             | df          | Wald Chi-Square | Sig.     | Wald Chi-Square   | Sig.     | Wald Chi-Square           | Sig.     | Wald Chi-Square                      | Sig.   |
| (Intercept)           | 1           | 84.628          | <0.001   | 625.562           | <0.001   | 856.957                   | <0.001   | 861.589                              | <0.001 |
| Center                | 7           | 14.837          | 0.038    | 9.575             | 0.214    | 7.588                     | 0.370    | 6.795                                | 0.451  |
| Gender                | 1           | 0.405           | 0.525    | 0.716             | 0.398    | 0.970                     | 0.325    | 1.497                                | 0.221  |
| Age groups            | 2           | 5.544           | 0.063    | 5.884             | 0.053    | 6.138                     | 0.046    | 9.690                                | 0.008  |
| Lympho/mono           | 1           | 6.152           | 0.013    | 9.594             | 0.002    | 14.020                    | <0.001   | 13.356                               | <0.001 |

†Analysis was performed by GLM using linear model with identity link-function considering as dependent variable: *TET1* non-transformed data; Ln(*TET1*) data; Ln(*TET1*) data after batch correction (B.C); and Ln(*TET1*) data after batch correction retaining age and gender differences (B.C.\_age;gender). Model: (Intercept), center, gender, age groups, lympho/mono (included in the model as continuous variable).

**Supplementary Table 4.** Regression analysis of *TET1* mRNA levels with age considering lympho/mono ratio†

| Model                                |             | Coefficients                     |                 | Bootstrap for Coefficients |                         |                                               |
|--------------------------------------|-------------|----------------------------------|-----------------|----------------------------|-------------------------|-----------------------------------------------|
|                                      |             | B ± SE                           | Beta            | Bias                       | Sig                     | 95% CI                                        |
| <i>TET1</i>                          | (Constant)  | 0.210                            |                 |                            |                         |                                               |
|                                      | Age (y)     | -0.001 ± 0.0004<br>0.009 ± 0.003 | -0.188<br>0.193 | <0.001<br><0.001<br><0.001 | 0.001<br>0.001<br>0.005 | 0.154;0.270<br>-0.002;0.000<br>0.002;0.015    |
|                                      | Lympho/mono |                                  |                 |                            |                         |                                               |
| Ln( <i>TET1</i> )                    | (Constant)  | -1.661 ± 0.152                   |                 |                            |                         |                                               |
|                                      | Age (y)     | -0.006 ± 0.002<br>0.054 ± 0.015  | -0.203<br>0.241 | <0.001<br><0.001<br><0.001 | 0.001<br>0.004<br>0.003 | -1.926;-1.360<br>-0.009;-0.002<br>0.025;0.085 |
|                                      | Lympho/mono |                                  |                 |                            |                         |                                               |
| Ln( <i>TET1</i> )<br>B.C.            | (Constant)  | -1.673                           |                 |                            |                         |                                               |
|                                      | Age (y)     | -0.005 ± 0.002<br>0.053 ± 0.013  | -0.224<br>0.275 | -0.015<br><0.001<br>0.001  | 0.001<br>0.001<br>0.001 | -1.925;-1.439<br>-0.008;-0.002<br>0.031;0.082 |
|                                      | Lympho/mono |                                  |                 |                            |                         |                                               |
| Ln( <i>TET1</i> )<br>B.C._age;gender | (Constant)  | -1.590                           |                 |                            |                         |                                               |
|                                      | Age (y)     | -0.007 ± 0.002<br>0.052 ± 0.012  | -0.279<br>0.267 | -0.004<br><0.001<br><0.001 | 0.001<br>0.001<br>0.001 | -1.833;-1.327<br>-0.010;-0.004<br>0.027;0.078 |
|                                      | Lympho/mono |                                  |                 |                            |                         |                                               |

† Regression analysis was performed by using as dependent variable: *TET1* not-transformed data; Ln(*TET1*) data; Ln(*TET1*) data after batch correction (B.C); and Ln(*TET1*) data after batch correction retaining age and gender differences (B.C.\_age;gender). Bootstrap results are based on 1000 stratified (by recruitment center and gender) bootstrap samples.

**Supplementary Table 5.** Influence of selected factors and covariates on age-related changes of *TET2* expression†

| Test of Model Effects | <i>TET2</i> |                 | Ln( <i>TET2</i> ) |                 | Ln( <i>TET2</i> )<br>B.C. |                 | Ln( <i>TET2</i> )<br>B.C._age;gender |                 |        |
|-----------------------|-------------|-----------------|-------------------|-----------------|---------------------------|-----------------|--------------------------------------|-----------------|--------|
|                       | Type III    | Type III        | Type III          | Type III        | Type III                  | Type III        | Type III                             |                 |        |
| Variables             | df          | Wald Chi-Square | Sig.              | Wald Chi-Square | Sig.                      | Wald Chi-Square | Sig.                                 | Wald Chi-Square | Sig.   |
| (Intercept)           | 1           | 28.451          | <0.001            | 118.959         | <0.001                    | 132.782         | <0.001                               | 132.671         | <0.001 |
| Center                | 7           | 5.158           | 0.641             | 3.342           | 0.852                     | 6.244           | 0.512                                | 5.507           | 0.598  |
| Gender                | 1           | 3.306           | 0.069             | 3.933           | 0.047                     | 2.523           | 0.112                                | 3.441           | 0.064  |
| Age groups            | 2           | 1.898           | 0.387             | 4.781           | 0.092                     | 2.019           | 0.364                                | 2.245           | 0.326  |
| Lympho/mono           | 1           | 2.281           | 0.131             | 5.942           | 0.015                     | 4.789           | 0.029                                | 4.796           | 0.029  |

† Analysis was performed by GLM using linear model with identity link-function considering as dependent variable: *TET2* not-transformed data; Ln(*TET2*) data; Ln(*TET2*) data after batch correction (B.C); and Ln(*TET2*) data after batch correction retaining age and gender differences (B.C.\_age;gender). Model: (Intercept), center, gender, age groups, lympho/mono (included in the model as continuous variable).

**Supplementary Table 6.** Influence of selected factors and covariates on age-related changes of *TET3* expression†

| Test of Model Effects |    | <i>TET3</i>     |        | Ln( <i>TET3</i> ) |        | Ln( <i>TET3</i> )<br>B.C. |        | Ln( <i>TET3</i> )<br>B.C._age;gender |        |
|-----------------------|----|-----------------|--------|-------------------|--------|---------------------------|--------|--------------------------------------|--------|
| Variables             | df | Type III        |        | Type III          |        | Type III                  |        | Type III                             |        |
|                       |    | Wald Chi-Square | Sig.   | Wald Chi-Square   | Sig.   | Wald Chi-Square           | Sig.   | Wald Chi-Square                      | Sig.   |
| (Intercept)           | 1  | 322.147         | <0.001 | 416.554           | <0.001 | 592.997                   | <0.001 | 624.541                              | <0.001 |
| Center                | 7  | 19.893          | 0.006  | 17.491            | 0.014  | 15.306                    | 0.032  | 13.952                               | 0.052  |
| Gender                | 1  | 6.964           | 0.008  | 8.302             | 0.004  | 4.650                     | 0.031  | 5.990                                | 0.014  |
| Age groups            | 2  | 9.621           | 0.008  | 9.914             | 0.007  | 18.615                    | <0.001 | 30.389                               | <0.001 |
| Lympho/mono           | 1  | 1.211           | 0.271  | 2.918             | 0.088  | 3.590                     | 0.058  | 4.913                                | 0.027  |

†Analysis was performed by GLM using linear model with identity link-function considering as dependent variable: *TET3* not-transformed data; Ln(*TET3*) data; Ln(*TET3*) data after batch correction (B.C); and Ln(*TET3*) data after batch correction retaining age and gender differences (B.C.\_age;gender). Model: (Intercept), center, gender, age groups, lympho/mono (included in the model as continuous variable).

**Supplementary Table 7.** Regression analysis of *TDG* mRNA levels in PBMC†

| Model                               |            | Coefficients   |        | Bootstrap for Coefficients |       |                              |
|-------------------------------------|------------|----------------|--------|----------------------------|-------|------------------------------|
|                                     |            | B ± SE         | Beta   | Bias                       | Sig   | 95% CI                       |
| <i>TDG</i>                          | (Constant) | -0.246 ± 0.026 |        | <0.001                     | 0.001 | 0.195;0.303                  |
|                                     | Age (y)    | -0.001±0.000   | -0.161 | <0.001                     | 0.050 | -0.002;-3.349E <sup>-5</sup> |
| Ln( <i>TDG</i> )                    | (Constant) | 1.436±0.109    |        | 0.003                      | 0.001 | -1.631;-1.234                |
|                                     | Age (y)    | -0.005±0.002   | -0.194 | <0.001                     | 0.005 | -0.009;-0.001                |
| Ln( <i>TDG</i> )<br>B.C.            | (Constant) | -1.519±0.095   |        | -0.001                     | 0.001 | -1.721;-1.325                |
|                                     | Age (y)    | -0.004±0.002   | -0.161 | <0.001                     | 0.034 | -0.007;-1.777E <sup>-5</sup> |
| Ln( <i>TDG</i> )<br>B.C._age;gender | (Constant) | -1.485 ±0.094  |        | 0.003                      | 0.001 | -1.676;-1.292                |
|                                     | Age (y)    | -0.004±0.002   | -0.188 | <0.001                     | 0.020 | -0.007;-0.005                |

† Regression analysis was performed by using as dependent variable: *TDG* not-transformed data; Ln(*TDG*) data; Ln(*TDG*) data after batch correction (B.C); and Ln(*TDG*) data after batch correction retaining age and gender differences (B.C.\_age;gender). Bootstrap results are based on 1000 stratified (by recruitment center and gender) bootstrap samples.

**Supplementary Table 8.** Influence of selected factors and covariates on age-related changes of *TDG* expression†

| Test of Model Effects | <i>TDG</i> |                 | Ln( <i>TDG</i> ) |                 | Ln( <i>TDG</i> )<br>B.C. |                 | Ln( <i>TDG</i> )<br>B.C._age;gender |                 |        |
|-----------------------|------------|-----------------|------------------|-----------------|--------------------------|-----------------|-------------------------------------|-----------------|--------|
|                       | Type III   |                 | Type III         |                 | Type III                 |                 | Type III                            |                 |        |
| Variables             | df         | Wald Chi-Square | Sig.             | Wald Chi-Square | Sig.                     | Wald Chi-Square | Sig.                                | Wald Chi-Square | Sig.   |
| <b>(Intercept)</b>    | 1          | 111.058         | <0.001           | 542.769         | <0.001                   | 773.422         | <0.001                              | 764.387         | <0.001 |
| <b>Center</b>         | 7          | 40.802          | <0.001           | 36.851          | <0.001                   | 32.153          | <0.001                              | 29.293          | <0.001 |
| <b>Gender</b>         | 1          | 1.082           | 0.297            | 0.821           | 0.365                    | 0.931           | 0.334                               | 1.129           | 0.288  |
| <b>Age groups</b>     | 2          | 2.079           | 0.354            | 3.411           | 0.182                    | 3.167           | 0.205                               | 4.246           | 0.120  |
| <b>Lympho/mono</b>    | 1          | 0.524           | 0.469            | 0.000           | 0.992                    | 1.026           | 0.311                               | 0.880           | 0.348  |

†Analysis was performed by GLM using linear model with identity link-function considering as dependent variable: *TDG* not-transformed data; Ln(*TDG*) data; Ln(*TDG*) data after batch correction (B.C); and Ln(*TDG*) data after batch correction retaining age and gender differences (B.C.\_age;gender). Model: (Intercept), center, gender, age groups, lympho/mono (included in the model as continuous variable).

**Supplementary Table 9.** Regression analysis of 5hm Clevels in PBMCT†

| Model                               |                | Coefficients  |        | Bootstrap for Coefficients |       |               |
|-------------------------------------|----------------|---------------|--------|----------------------------|-------|---------------|
|                                     |                | B ± SE        | Beta   | Bias                       | Sig   | 95% CI        |
| <b>5hmC</b>                         | (Constant)     | 1.341 ± 0.106 |        | 0.001                      | 0.001 | 1.165;1.527   |
|                                     | <b>Age (y)</b> | -0.004±0.002  | -0.190 | <0.001                     | 0.008 | -0.008;-0.001 |
| <b>Ln(5hmC)</b>                     | (Constant)     | 0.298±0.102   |        | -0.006                     | 0.001 | 0.131;0.462   |
|                                     | <b>Age (y)</b> | -0.004±0.002  | -0.199 | <0.001                     | 0.005 | -0.007;-0.001 |
| <b>Ln(5hmC)<br/>B.C.</b>            | (Constant)     | 0.303±0.092   |        | 0.002                      | 0.001 | 0.145;0.462   |
|                                     | <b>Age (y)</b> | -0.005±0.002  | -0.227 | <0.001                     | 0.004 | -0.007;-0.002 |
| <b>Ln(5hmC)<br/>B.C._age;gender</b> | (Constant)     | 0.353±0.092   |        | 0.001                      | 0.001 | 0.205;0.503   |
|                                     | <b>Age (y)</b> | -0.005±0.002  | -0.266 | <0.001                     | 0.002 | -0.008;-0.003 |

† Regression analysis was performed by using as dependent variable: 5hmC not-transformed data; Ln(5hmC) data; Ln(5hmC) data after batch correction (B.C); and Ln(5hmC) data after batch correction retaining age and gender differences (B.C.\_age;gender). Bootstrap results are based on 1000 stratified (by recruitment center and gender) bootstrap samples.

**Supplementary Table 10.** Influence of selected factors and covariates on age-related changes of 5hmC level<sup>†</sup>

| Test of Model Effects |    | 5hmC            |        | Ln(5hmC)        |       | Ln(5hmC) B.C.   |       | Ln(5hmC) B.C._age;gender |       |
|-----------------------|----|-----------------|--------|-----------------|-------|-----------------|-------|--------------------------|-------|
|                       |    | Type III        |        | Type III        |       | Type III        |       | Type III                 |       |
| Variables             | df | Wald Chi-Square | Sig.   | Wald Chi-Square | Sig.  | Wald Chi-Square | Sig.  | Wald Chi-Square          | Sig.  |
| <b>(Intercept)</b>    | 1  | 220.480         | <0.001 | 0.135           | 0.713 | 0.348           | 0.555 | 0.369                    | 0.543 |
| <b>Center</b>         | 7  | 13.213          | 0.067  | 15.579          | 0.029 | 16.095          | 0.024 | 15.522                   | 0.030 |
| <b>Gender</b>         | 1  | 0.916           | 0.339  | 1.755           | 0.185 | 3.273           | 0.070 | 4.089                    | 0.043 |
| <b>Age groups</b>     | 2  | 10.599          | 0.005  | 13.316          | 0.001 | 12.444          | 0.002 | 14.633                   | 0.001 |
| <b>Lympho/mono</b>    | 1  | 0.014           | 0.906  | 0.113           | 0.737 | 0.010           | 0.919 | 0.033                    | 0.857 |

<sup>†</sup>Analysis was performed by GLM using linear model with identity link-function considering as dependent variable: 5hmCnot-transformed data; Ln(5hmC) data; Ln(5hmC) data after batch correction (B.C); and Ln(5hmC) data after batch correction retaining age and gender differences (B.C.\_age;gender). Model: (Intercept), center, gender, age groups, lympho/mono (included in the model as continuous variable).
